# Supplementary material for: Application of network link prediction in drug discovery
Source: PubMed Central journal article supplement (PMC8042985; doi:10.1186/s12859-021-04082-y), 2021-04-12
Supplement: 12859_2021_4082_MOESM1_ESM.pdf [file 12859_2021_4082_MOESM1_ESM.pdf]

# Application of network link prediction in drug discovery: supplemental document

This is supplementary information for "Application of network link prediction in drug discovery".

## 1. SHAPIRO-WILK NORMALITY TESTS OF THE RESULTS

Here we presents the normality tests report of Shaphiro-wilk [1] tests results. We have presented the p-value of our normality tests of 10 generated results.

**Table S1.** P-value of the normality tests of our 10-fold cross validation results.

| Model   | DGA     | DDA     | Matadoor | DTI     | DDI     |
|---------|---------|---------|----------|---------|---------|
| CN      | 0.79481 | 0.70266 | 0.90985  | 0.21523 | 0.39505 |
| Salton  | 0.06959 | 0.45454 | 0.92826  | 0.68971 | 0.40904 |
| Jaccard | 0.8308  | 0.44919 | 0.12941  | 0.81832 | 0.08995 |
| Sorens  | 0.86372 | 0.83481 | 0.01473  | 0.51624 | 0.82011 |
| HPI     | 0.52056 | 0.22235 | 0.80214  | 0.52167 | 0.70653 |
| HDI     | 0.02085 | 0.35159 | 0.07789  | 0.40331 | 0.81069 |
| LHN     | 0.12232 | 0.47553 | 0.01413  | 0.03343 | 0.47661 |
| AA      | 0.21967 | 0.76986 | 0.02484  | 0.64768 | 0.14119 |
| RA      | 0.46554 | 0.58525 | 0.52285  | 0.72483 | 0.86221 |
| PA      | 0.00515 | 0.90991 | 0.85119  | 0.38271 | 0.01209 |
| LNBCN   | 0.1942  | 0.01096 | 0.71814  | 0.42578 | 0.25423 |
| LNBA    | 0.07586 | 0.20439 | 0.79121  | 0.20813 | 0.96554 |
| LNBR    | 0.05343 | 0.05988 | 0.61907  | 0.8301  | 0.05251 |
| LocalP  | 0.22281 | 0.88416 | 0.5855   | 0.11142 | 0.26086 |
| Katz.01 | 0.27752 | 0.6411  | 0.30219  | 0.98171 | 0.71915 |
| ~.001   | 0.01077 | 0.03839 | 0.46608  | 0.6542  | 0.6043  |
| LHNII.9 | 0.01077 | 0.03839 | 0.46608  | 0.6542  | 0.6043  |
| ~.95    | 0.01077 | 0.03839 | 0.46608  | 0.6542  | 0.6043  |
| ~.99    | 0.01077 | 0.03839 | 0.46608  | 0.6542  | 0.6043  |
| ACT     | 0.32746 | 0.86959 | 0.60445  | 0.83174 | 0.62093 |
| CosPlus | 0.89245 | 0.42556 | 0.30313  | 0.81287 | 0.81377 |
| RWR.85  | 0.54166 | 0.06524 | 0.52404  | 0.71435 | 0.69588 |
| ~.95    | 0.22724 | 0.30996 | 0.84251  | 0.53375 | 0.57231 |
| SimR    | 0.22724 | 0.30996 | 0.84251  | 0.53375 | 0.57231 |
| LRW_3   | 0.5917  | 0.68159 | 0.61714  | 0.09497 | 0.81485 |
| ~_4     | 0.78782 | 0.72649 | 0.32267  | 0.39003 | 0.28578 |

**Table S1.** P-value of the normality tests of our 10-fold cross validation results.

| Model    | DGA      | DDA     | Matadoor | DTI     | DDI      |
|----------|----------|---------|----------|---------|----------|
| ~_5      | 0.7163   | 0.59284 | 0.07955  | 0.09415 | 0.53866  |
| SRW_3    | 0.27078  | 0.06993 | 0.68071  | 0.17221 | 0.80954  |
| ~_4      | 0.754    | 0.68743 | 0.69839  | 0.13357 | 0.02081  |
| ~_5      | 0.55365  | 0.44357 | 0.60222  | 0.79945 | 0.54719  |
| MFI      | 0.76882  | 0.86222 | 0.46362  | 0.88972 | 0.21698  |
| TSCN     | 0.64941  | 0.3489  | 0.15333  | 0.46545 | 0.88327  |
| Prone    | 0.06113  | 0.06339 | 0.21471  | 0.02583 | 0.2622   |
| NetMF    | 0.01209  | 0.02056 | 0.2388   | 0.24808 | 0.1351   |
| Node2Vec | 0.32345  | 0.04977 | 0.54069  | 0.7396  | 0.1351   |
| DeepWalk | 0.01785  | 0.3053  | 0.25771  | 0.11561 | 0.27543  |
| Hope     | 0.491639 | 0.02938 | 0.49266  | 0.54069 | 0.11561  |
| NetSMF   | 0.4132   | 0.7881  | 0.35329  | 0.36211 | 0.353294 |
| Grarep   | 0.85945  | 0.87028 | 0.98565  | 0.67028 | 0.933567 |

## 2. MODEL PERFORMANCE TESTS

Here we present overall error score of all the models on the basis of average score on all the five data-sets. The result is generated based on Friedman test[2].

**Table S2.** This table presents the average error score ( $AUROC_{error}$ ) of all the models across all the datasets.

| Model   | Min    | Q1     | Median | Q3     | Max    |
|---------|--------|--------|--------|--------|--------|
| CN      | 0.4267 | 0.4267 | 0.4267 | 0.4267 | 0.4267 |
| Salton  | 0.4268 | 0.4268 | 0.4268 | 0.4268 | 0.4268 |
| Jaccard | 0.4268 | 0.4268 | 0.4268 | 0.4268 | 0.4268 |
| Sorens  | 0.4268 | 0.4268 | 0.4268 | 0.4268 | 0.4268 |
| HPI     | 0.4267 | 0.4267 | 0.4267 | 0.4267 | 0.4267 |
| HDI     | 0.4268 | 0.4268 | 0.4268 | 0.4268 | 0.4268 |
| LHN     | 0.4268 | 0.4268 | 0.4268 | 0.4268 | 0.4268 |
| AA      | 0.4267 | 0.4267 | 0.4267 | 0.4267 | 0.4267 |
| RA      | 0.4267 | 0.4267 | 0.4267 | 0.4267 | 0.4267 |
| PA      | 0.549  | 0.549  | 0.549  | 0.549  | 0.549  |
| LNBCN   | 0.4267 | 0.4267 | 0.4267 | 0.4267 | 0.4267 |
| LNBA    | 0.4267 | 0.4267 | 0.4267 | 0.4267 | 0.4267 |
| LNBR    | 0.4267 | 0.4267 | 0.4267 | 0.4267 | 0.4267 |
| LocalP  | 0.3867 | 0.3867 | 0.3867 | 0.3867 | 0.3867 |
| Katz.01 | 0.404  | 0.404  | 0.404  | 0.404  | 0.404  |
| ~.001   | 0.404  | 0.404  | 0.404  | 0.404  | 0.404  |

**Table S2.** This table presents the average error score ( $AUROC_{error}$ ) of all the models across all the datasets.

| Model    | Min    | Q1      | Median | Q3      | Max    |
|----------|--------|---------|--------|---------|--------|
| LHNII.9  | 0.404  | 0.404   | 0.404  | 0.404   | 0.404  |
| ~.95     | 0.3512 | 0.3512  | 0.3512 | 0.3512  | 0.3512 |
| ~.99     | 0.3514 | 0.3514  | 0.3514 | 0.3514  | 0.3514 |
| ACT      | 0.1866 | 0.1866  | 0.1866 | 0.1866  | 0.1866 |
| CosPlus  | 0.3025 | 0.3025  | 0.3025 | 0.3025  | 0.3025 |
| RWR.85   | 0.4012 | 0.4012  | 0.4012 | 0.4012  | 0.4012 |
| ~.95     | 0.4006 | 0.4006  | 0.4006 | 0.4006  | 0.4006 |
| SimR     | 0.2981 | 0.2981  | 0.2981 | 0.2981  | 0.2981 |
| LRW_3    | 0.3393 | 0.3393  | 0.3393 | 0.3393  | 0.3393 |
| ~_4      | 0.2967 | 0.2967  | 0.2967 | 0.2967  | 0.2967 |
| ~_5      | 0.2624 | 0.2624  | 0.2624 | 0.2624  | 0.2624 |
| SRW_3    | 0.3394 | 0.3394  | 0.3394 | 0.3394  | 0.3394 |
| ~_4      | 0.2966 | 0.2966  | 0.2966 | 0.2966  | 0.2966 |
| ~_5      | 0.2624 | 0.2624  | 0.2624 | 0.2624  | 0.2624 |
| MFI      | 0.4022 | 0.4022  | 0.4022 | 0.4022  | 0.4022 |
| TSCN     | 0.4094 | 0.4094  | 0.4094 | 0.4094  | 0.4094 |
| prone    | 0.0514 | 0.05545 | 0.1627 | 0.23735 | 0.2611 |
| netmf    | 0.045  | 0.07855 | 0.146  | 0.3768  | 0.5084 |
| node2vec | 0.0843 | 0.1389  | 0.3027 | 0.41415 | 0.4181 |
| Deepwalk | 0.0849 | 0.1396  | 0.302  | 0.4162  | 0.4195 |
| hope     | 0.1106 | 0.1401  | 0.2682 | 0.3805  | 0.3914 |
| netmf    | 0.2077 | 0.2443  | 0.2905 | 0.52285 | 0.6178 |
| grarep   | 0.3261 | 0.47325 | 0.7008 | 0.82555 | 0.9276 |

### 3. TEST TABLE

#### REFERENCES

1. S. S. Shapiro and M. B. Wilk, "An analysis of variance test for normality (complete samples)," *Biometrika* **52**, 591–611 (1965).
2. M. Friedman, "The use of ranks to avoid the assumption of normality implicit in the analysis of variance," *J. American statistical association* **32**, 675–701 (1937).

**Table S3.** Model performance according to the three evaluation metrics: AUROC, AUPR, and F1-score (F1)

| Datasets | DGA           |               |               | DDA           |               |               | DTI           |               |               | Matador      |              |               | DDI           |               |               |
|----------|---------------|---------------|---------------|---------------|---------------|---------------|---------------|---------------|---------------|--------------|--------------|---------------|---------------|---------------|---------------|
| Models   | AUROC         | AUPR          | F1            | AUROC         | AUPR          | F1            | AUROC         | AUPR          | F1            | AUROC        | AUPR         | F1            | AUROC         | AUPR          | F1            |
| CN       | 0.5733        | 0.7803        | 0.5           | 0.5733        | 0.7803        | 0.5           | 0.5733        | 0.7803        | 0.5           | 0.5733       | 0.7803       | 0.5           | 0.5733        | 0.7803        | 0.5           |
| Salton   | 0.5732        | 0.7776        | 0.5           | 0.5732        | 0.7776        | 0.5           | 0.5732        | 0.7776        | 0.5           | 0.5732       | 0.7776       | 0.5           | 0.5732        | 0.7776        | 0.5           |
| Jaccard  | 0.5732        | 0.7765        | 0.5           | 0.5732        | 0.7765        | 0.5           | 0.5732        | 0.7765        | 0.5           | 0.5732       | 0.7765       | 0.5           | 0.5732        | 0.7765        | 0.5           |
| Sorensen | 0.5732        | 0.7765        | 0.5           | 0.5732        | 0.7765        | 0.5           | 0.5732        | 0.7765        | 0.5           | 0.5732       | 0.7765       | 0.5           | 0.5732        | 0.7765        | 0.5           |
| HPI      | 0.5733        | 0.7265        | 0.5           | 0.5733        | 0.7265        | 0.5           | 0.5733        | 0.7265        | 0.5           | 0.5733       | 0.7265       | 0.5           | 0.5733        | 0.7265        | 0.5           |
| HDI      | 0.5732        | 0.7765        | 0.5           | 0.5732        | 0.7765        | 0.5           | 0.5732        | 0.7765        | 0.5           | 0.5732       | 0.7765       | 0.5           | 0.5732        | 0.7765        | 0.5           |
| LHN      | 0.5732        | 0.7773        | 0.5           | 0.5732        | 0.7773        | 0.5           | 0.5732        | 0.7773        | 0.5           | 0.5732       | 0.7773       | 0.5           | 0.5732        | 0.7773        | 0.5           |
| AA       | 0.5733        | 0.7807        | 0.5           | 0.5733        | 0.7807        | 0.5           | 0.5733        | 0.7807        | 0.5           | 0.5733       | 0.7807       | 0.5           | 0.5733        | 0.7807        | 0.5           |
| RA       | 0.5733        | 0.7805        | 0.5           | 0.5733        | 0.7805        | 0.5           | 0.5733        | 0.7805        | 0.5           | 0.5733       | 0.7805       | 0.5           | 0.5733        | 0.7805        | 0.5           |
| PA       | 0.451         | 0.5183        | 0.5           | 0.451         | 0.5183        | 0.5           | 0.451         | 0.5183        | 0.5           | 0.451        | 0.5183       | 0.5           | 0.451         | 0.5183        | 0.5           |
| LNBCN    | 0.5733        | 0.7811        | 0.5           | 0.5733        | 0.7811        | 0.5           | 0.5733        | 0.7811        | 0.5           | 0.5733       | 0.7811       | 0.5           | 0.5733        | 0.7811        | 0.5           |
| LNBA     | 0.5733        | 0.7809        | 0.5           | 0.5733        | 0.7809        | 0.5           | 0.5733        | 0.7809        | 0.5           | 0.5733       | 0.7809       | 0.5           | 0.5733        | 0.7809        | 0.5           |
| LNBR     | 0.5733        | 0.7808        | 0.5           | 0.5733        | 0.7808        | 0.5           | 0.5733        | 0.7808        | 0.5           | 0.5733       | 0.7808       | 0.5           | 0.5733        | 0.7808        | 0.5           |
| LocalP   | 0.6133        | 0.8004        | 0.5           | 0.6133        | 0.8004        | 0.5           | 0.6133        | 0.8004        | 0.5           | 0.6133       | 0.8004       | 0.5           | 0.6133        | 0.8004        | 0.5           |
| Katz_01  | 0.596         | 0.728         | 0.5           | 0.596         | 0.728         | 0.5           | 0.596         | 0.728         | 0.5           | 0.596        | 0.728        | 0.5           | 0.596         | 0.728         | 0.5           |
| ~_001    | 0.596         | 0.728         | 0.5           | 0.596         | 0.728         | 0.5           | 0.596         | 0.728         | 0.5           | 0.596        | 0.728        | 0.5           | 0.596         | 0.728         | 0.5           |
| LHN2_9   | 0.596         | 0.728         | 0.5           | 0.596         | 0.728         | 0.5           | 0.596         | 0.728         | 0.5           | 0.596        | 0.728        | 0.5           | 0.596         | 0.728         | 0.5           |
| ~_95     | 0.6488        | 0.7606        | <b>0.7492</b> | 0.6488        | 0.7606        | <b>0.7492</b> | 0.6488        | 0.7606        | 0.7492        | 0.6488       | 0.7606       | 0.7492        | 0.6488        | 0.7606        | 0.7492        |
| ~_99     | 0.6486        | 0.76          | 0.7481        | 0.6486        | 0.76          | 0.7481        | 0.6486        | 0.76          | 0.7481        | 0.6486       | 0.76         | 0.7481        | 0.6486        | 0.76          | 0.7481        |
| ACT      | <b>0.8134</b> | 0.7868        | 0.7272        | <b>0.8134</b> | 0.7868        | 0.7272        | 0.8134        | 0.7868        | 0.7272        | 0.8134       | 0.7868       | 0.7272        | 0.8134        | 0.7868        | 0.7272        |
| CosPlus  | 0.6975        | 0.7409        | 0.7192        | 0.6975        | 0.7409        | 0.7192        | 0.6975        | 0.7409        | 0.7192        | 0.6975       | 0.7409       | 0.7192        | 0.6975        | 0.7409        | 0.7192        |
| RWR_85   | 0.5988        | 0.7321        | 0.5           | 0.5988        | 0.7321        | 0.5           | 0.5988        | 0.7321        | 0.5           | 0.5988       | 0.7321       | 0.5           | 0.5988        | 0.7321        | 0.5           |
| ~_95     | 0.5994        | 0.7331        | 0.5           | 0.5994        | 0.7331        | 0.5           | 0.5994        | 0.7331        | 0.5           | 0.5994       | 0.7331       | 0.5           | 0.5994        | 0.7331        | 0.5           |
| SimR     | 0.7019        | 0.8202        | 0.5           | 0.7019        | 0.8202        | 0.5           | 0.7019        | 0.8202        | 0.5           | 0.7019       | 0.8202       | 0.5           | 0.7019        | 0.8202        | 0.5           |
| LRW_3    | 0.6607        | 0.8054        | 0.4462        | 0.6607        | 0.8054        | 0.4462        | 0.6607        | 0.8054        | 0.4462        | 0.6607       | 0.8054       | 0.4462        | 0.6607        | 0.8054        | 0.4462        |
| ~_4      | 0.7033        | 0.8255        | 0.4462        | 0.7033        | 0.8255        | 0.4462        | 0.7033        | 0.8255        | 0.4462        | 0.7033       | 0.8255       | 0.4462        | 0.7033        | 0.8255        | 0.4462        |
| ~_5      | 0.7376        | <b>0.8443</b> | 0.7335        | 0.7376        | <b>0.8443</b> | 0.7335        | 0.7376        | 0.8443        | 0.7335        | 0.7376       | 0.8443       | 0.7335        | 0.7376        | 0.8443        | 0.7335        |
| SRW_3    | 0.6606        | 0.8042        | 0.4462        | 0.6606        | 0.8042        | 0.4462        | 0.6606        | 0.8042        | 0.4462        | 0.6606       | 0.8042       | 0.4462        | 0.6606        | 0.8042        | 0.4462        |
| ~_4      | 0.7034        | 0.8261        | 0.4462        | 0.7034        | 0.8261        | 0.4462        | 0.7034        | 0.8261        | 0.4462        | 0.7034       | 0.8261       | 0.4462        | 0.7034        | 0.8261        | 0.4462        |
| ~_5      | 0.7376        | 0.8432        | 0.7334        | 0.7376        | 0.8432        | 0.7334        | 0.7376        | 0.8432        | 0.7334        | 0.7376       | 0.8432       | 0.7334        | 0.7376        | 0.8432        | 0.7334        |
| MFI      | 0.5978        | 0.7302        | 0.5           | 0.5978        | 0.7302        | 0.5           | 0.5978        | 0.7302        | 0.5           | 0.5978       | 0.7302       | 0.5           | 0.5978        | 0.7302        | 0.5           |
| TSCN     | 0.5906        | 0.7196        | 0.5           | 0.5906        | 0.7196        | 0.5           | 0.5906        | 0.7196        | 0.5           | 0.5906       | 0.7196       | 0.5           | 0.5906        | 0.7196        | 0.5           |
| Prone    | 0.7389        | 0.6995        | 0.647         | 0.7864        | 0.6803        | 0.7269        | 0.8373        | 0.8129        | 0.7158        | 0.9486       | 0.9346       | 0.9063        | <b>0.9405</b> | <b>0.9108</b> | <b>0.8854</b> |
| NetMF    | 0.7548        | 0.7262        | 0.692         | 0.4916        | 0.5078        | 0.5156        | <b>0.8879</b> | <b>0.8826</b> | <b>0.8182</b> | <b>0.955</b> | <b>0.941</b> | <b>0.9238</b> | 0.854         | 0.8435        | 0.8025        |
| Node2vec | 0.5898        | 0.5621        | 0.5153        | 0.5819        | 0.5175        | 0.5646        | 0.6973        | 0.6457        | 0.5543        | 0.9157       | 0.8864       | 0.8526        | 0.8065        | 0.7876        | 0.7357        |
| Deepwalk | 0.5871        | 0.5592        | 0.5098        | 0.5805        | 0.516         | 0.5657        | 0.698         | 0.6463        | 0.5548        | 0.9151       | 0.8863       | 0.8491        | 0.8057        | 0.7869        | 0.7336        |
| Hope     | 0.6304        | 0.5313        | 0.5542        | 0.6086        | 0.5542        | 0.6075        | 0.7318        | 0.6172        | 0.6128        | 0.8304       | 0.7457       | 0.7841        | 0.8894        | 0.866         | 0.8076        |
| NetSMF   | 0.5721        | 0.5282        | 0.5153        | 0.3822        | 0.3994        | 0.4111        | 0.7191        | 0.6449        | 0.5987        | 0.7923       | 0.7191       | 0.7431        | 0.7095        | 0.6736        | 0.6733        |
| Grarep   | 0.0724        | 0.277         | 0             | 0.2765        | 0.3671        | 0.318         | 0.3796        | 0.3252        | 0.1624        | 0.2992       | 0.3522       | 0.2538        | 0.6739        | 0.6286        | 0.6435        |
